# Supplementary material
Source: Elsevier journal article supplement (https://agroparistech.hal.science/hal-03451358v1/file/mmc2.pdf)

a

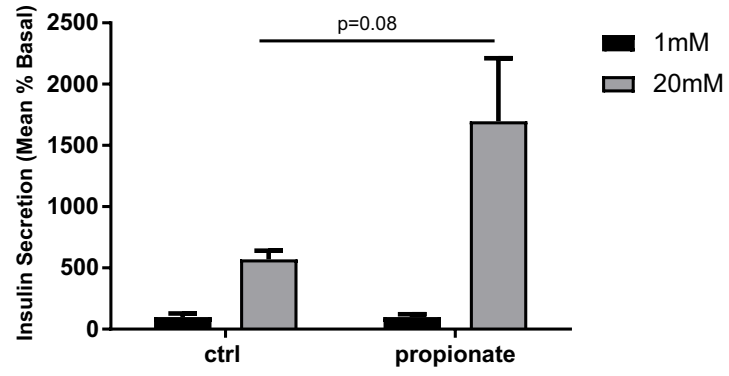

b

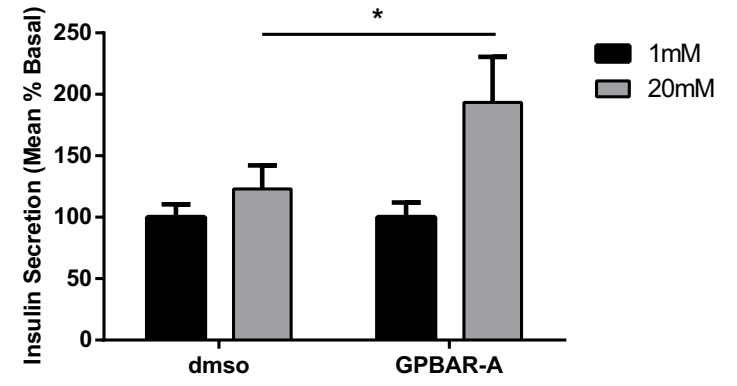

Supplement: mmc2 [file mmc2.pdf]
